# Supplementary material for: Metagenomic analysis of a glacial ice core record from the contiguous United States
Source: Research Square preprint supplement (doi:10.21203/rs.3.rs-5045654/v1), 2024-09-19
Supplement: Supplementary file 1 [file 7a27664baf51fcaeb1f0a151.xlsx]

## Sheet: Sheet1
Sample name	Top Depth (mbs)	Bottom Depth (mbs)	Length (m)	age	calculated cleaning loss (g)	cleaned sample weight (g)	DNA extraction method	extracted volume (uL)	initial DNA conc. (ng/uL)	post-WGA DNA conc. (ng/uL)	sequenced (Y/N)
Control	NA	NA	NA	NA	90	482	eDNA	24	0.0122	2.32	Y*
							HWM	110	0.0228	4.46	Y*
							FP	110	0.0047	4.4	Y*
26	26.5	26.87	0.37	1961-1962	120	793	eDNA	21	0.0172	73.6	Y
							HWM	100	*0.1967	46.2	Y
							FP	100	0.0256	2.88	N
51	51.035	51.85	0.815	1948	70	648	eDNA	19	0.0104	13.58	Y
							HWM	86	*0.2197	8.68	N
							FP	86	0.0203	3.06	N
69	69.352	70.252	0.9	1940-1941	127	712	eDNA	24	0.0119	14.3	Y
							HWM	110	*0.2754	9.1	N
							FP	110	0.0196	3.46	N
108	108.472	108.922	0.45	1914-1915	62	890	eDNA	30	0.0148	2	N
							HWM	150	0.0208	45.4	Y
							FP	150	0.0272	3.28	N
116	116.97	117.44	0.47	1900	56	912	eDNA	29	0.0268	2.98	N
							HWM	116	NA	NA	NA
							FP	116	0.0239	10.82	Y
153	153.007	153.45	0.443	1790-1792	103	720	eDNA	26	0.0103	65	Y
							HWM	248	0.0699	94	Y
							FP	248	0.028	19.88	Y
							PCRneg	NA	NA	2.2	Y*
									* diluted 1:10 for WGA		*sequenced with Nextera Flex for Enrichment
